# Supplementary material for: Homogeneous catalysis for photochemical vapor generation for speciation of inorganic selenium by high performance liquid chromatography-atomic fluorescence spectrometry
Source: Royal Society of Chemistry journal article supplement (doi:10.1039/d1ja00247c), 2021-01-01
Supplement: d1ja00247c1.pdf [file d1ja00247c1.pdf]

## Electronic Supplementary Information

### **Homogeneous Catalysis for Photochemical Vapor Generation for Speciation of Inorganic Selenium by High Performance Liquid Chromatography-Atomic Fluorescence Spectrometry**

Mengtian Li<sup>a</sup>, Hui Xia<sup>a</sup>, Jin Luo<sup>b</sup>, Xin Yang<sup>a</sup>, Hui Li<sup>a</sup>, Xingli Liu<sup>a</sup>, Fujian Xu<sup>\*a</sup>

\*Corresponding author' E-mail: luckyxufujian45@gmail.com

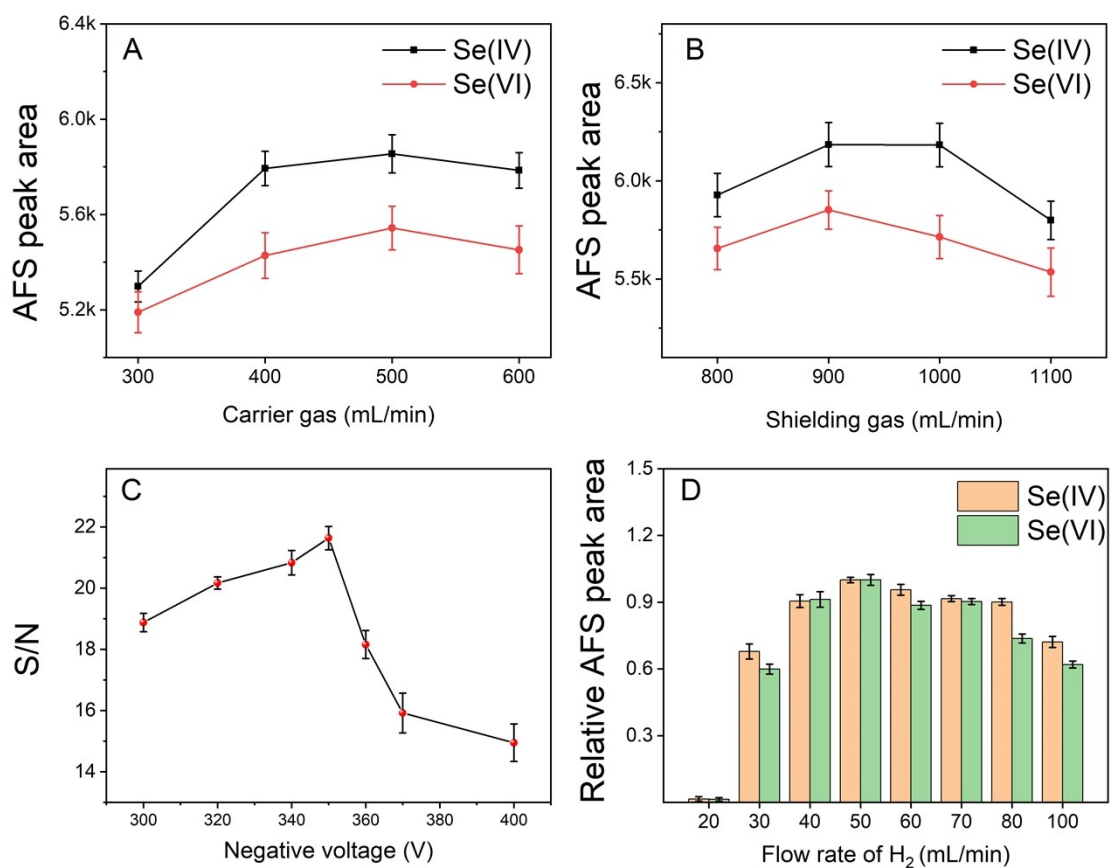

**Figure S1** Optimization of AFS instrument parameters for the detection of Se. Both concentrations of Se(IV) and Se(VI): 1.0  $\mu\text{g/mL}$ .

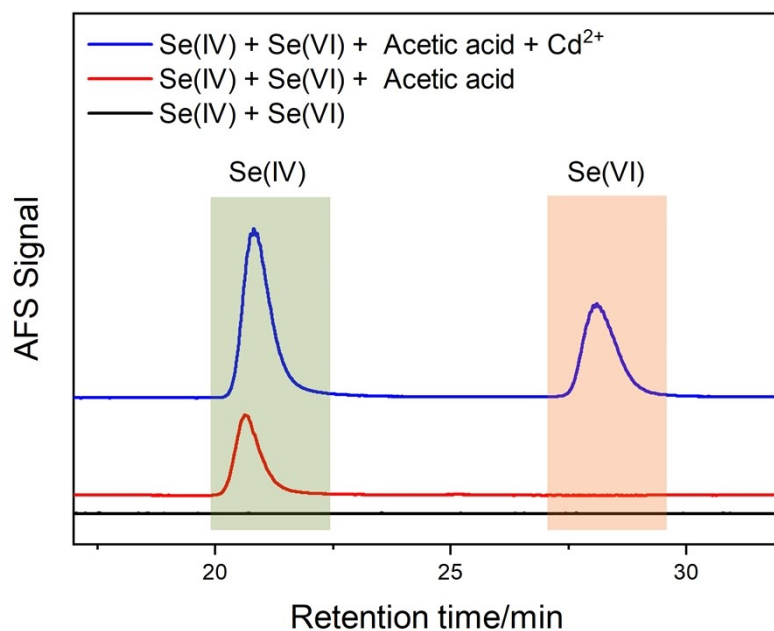

**Figure S2.** The effect of Cd ions on the AFS signal intensities of 1.0  $\mu\text{g/mL}$  Se(IV) and Se(VI). AS19 Column, mobile phase: 5.0 mM  $\text{Na}_2\text{CO}_3$ -1.3 mM  $\text{NaHCO}_3$ , and flow rate: 0.30 mL/min.

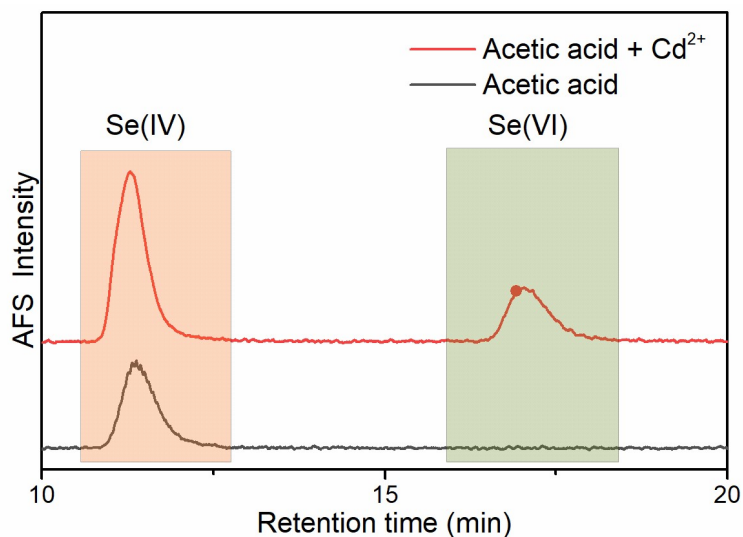

**Figure S3.** The chromatogram of phosphate buffer system. 40% acetic acid. PRP-X100 column, mobile phase: 100 mM  $\text{Na}_2\text{HPO}_3$ ,  $\text{Cd}^{2+}$  ion: 60  $\mu\text{g}/\text{mL}$ , flow rate: 0.30 mL/min, concentration of Se: 0.1  $\mu\text{g}/\text{mL}$ .

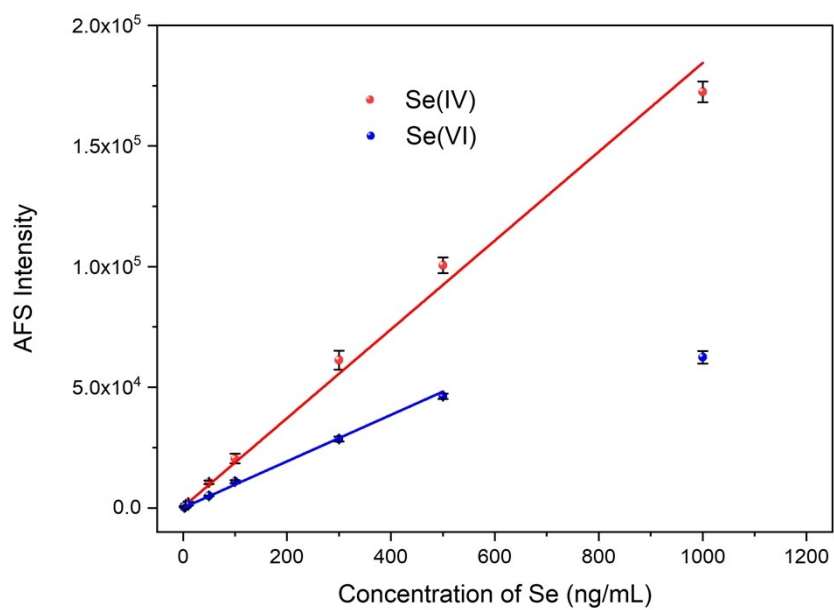

**Figure S4** The calibration curve of Se(IV) and Se(VI) in carbonate buffer system..

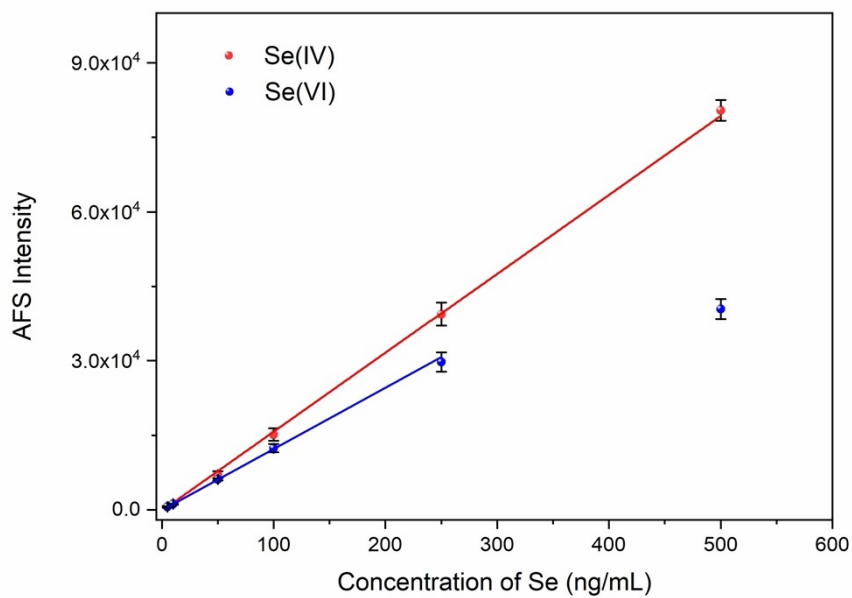

**Figure S5** The calibration curve of Se(IV) and Se(VI) in phosphate buffer system.

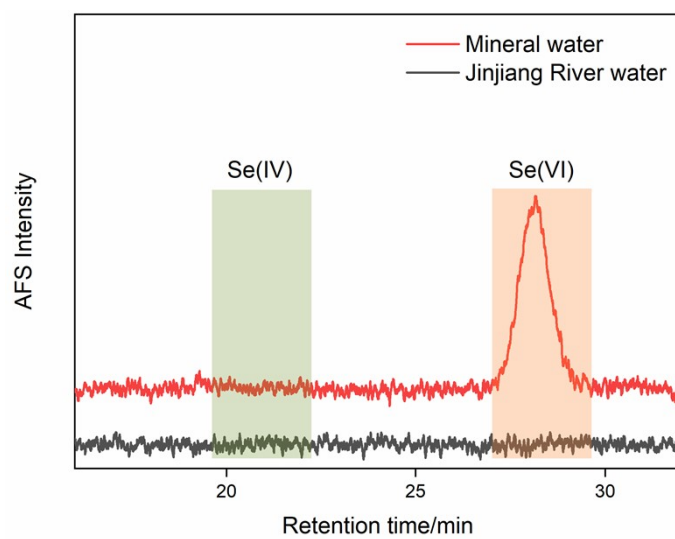

**Figure S6** The chromatogram of the real environmental samples. The red line is related to mineral water, the black line is related to Jinjiang River water.
